# Supplementary material for: Species Delimitation and Conservation in Taxonomically Challenging Lineages: The Case of Two Clades of Capurodendron (Sapotaceae) in Madagascar
Source: MDPI journal article supplement (doi:10.3390/plants10081702), 2021-08-18
Supplement: s1 [file s1]

Table S2. Results for the ABBA BABA tests. Numbers in taxa names correspond to the groups shown in Fig. 5. P-value threshold for Z-scores after Benjamini and Bonferroni corrections are indicated in bold and bold underlined, respectively.

| P1                                 | P2                                 | P3                                 | D-statistics | Z-score | p-value                  | f4-ratio  | BBAA    | ABBA    | BABA    |
|------------------------------------|------------------------------------|------------------------------------|--------------|---------|--------------------------|-----------|---------|---------|---------|
| <i>C. mandrarensis 1</i>           | <i>C. mandrarensis 2</i>           | <i>C. androyensis 1</i>            | 0.0497606    | 6.42715 | <b><u>6.50E-11</u></b>   | 0.251148  | 788.581 | 760.915 | 688.778 |
| <i>C. greveanum-mandrarensis 2</i> | <i>C. androyensis 2</i>            | <i>C. microphyllum</i>             | 0.10012      | 6.18189 | <b><u>3.17E-10</u></b>   | 0.0685898 | 1251.15 | 640.625 | 524.02  |
| <i>C. greveanum-mandrarensis 2</i> | <i>C. androyensis 1</i>            | <i>C. microphyllum</i>             | 0.121506     | 4.97969 | <b><u>3.18E-07</u></b>   | 0.0865021 | 1189.5  | 680.445 | 533.004 |
| <i>C. mandrarensis 1</i>           | <i>C. androyensis 1</i>            | <i>C. microphyllum</i>             | 0.0763872    | 4.10704 | <b><u>2.00E-05</u></b>   | 0.0558021 | 1182.49 | 634.857 | 544.75  |
| <i>C. greveanum-mandrarensis 2</i> | <i>C. mandrarensis 2</i>           | <i>C. microphyllum</i>             | 0.0776264    | 3.55601 | <b><u>0.00018827</u></b> | 0.0528676 | 1255.61 | 628.711 | 538.134 |
| <i>C. mandrarensis 1</i>           | <i>C. androyensis 2</i>            | <i>C. microphyllum</i>             | 0.0510879    | 3.5151  | <b><u>0.00021979</u></b> | 0.0363943 | 1221.69 | 609.713 | 550.443 |
| <i>C. greveanum-mandrarensis 1</i> | <i>C. androyensis 2</i>            | <i>C. microphyllum</i>             | 0.0812243    | 3.36528 | <b><u>0.00038233</u></b> | 0.0558256 | 1270.52 | 625.496 | 531.518 |
| <i>C. greveanum-mandrarensis 1</i> | <i>C. androyensis 1</i>            | <i>C. microphyllum</i>             | 0.103722     | 3.24326 | <b><u>0.00059085</u></b> | 0.0759686 | 1209.03 | 664.464 | 539.578 |
| <i>C. mandrarensis 2</i>           | <i>C. androyensis 1</i>            | <i>C. microphyllum</i>             | 0.0492489    | 3.06844 | <b><u>0.00107591</u></b> | 0.0346187 | 1225.69 | 605.738 | 548.875 |
| <i>C. androyensis 1</i>            | <i>C. androyensis 2</i>            | <i>C. greveanum-mandrarensis 1</i> | 0.0477013    | 3.02814 | <b><u>0.00123032</u></b> | 0.0383211 | 803.191 | 763.079 | 693.594 |
| <i>C. mandrarensis 2</i>           | <i>C. mandrarensis 1</i>           | <i>C. greveanum-mandrarensis 2</i> | 0.0399563    | 2.97038 | <b><u>0.00148717</u></b> | 0.107273  | 789.355 | 770.527 | 711.318 |
| <i>C. androyensis 1</i>            | <i>C. androyensis 2</i>            | <i>C. greveanum-mandrarensis 2</i> | 0.0493885    | 2.91606 | <b><u>0.0017724</u></b>  | 0.115775  | 824.512 | 749.663 | 679.099 |
| <i>C. mandrarensis 1</i>           | <i>C. mandrarensis 2</i>           | <i>C. androyensis 2</i>            | 0.0234767    | 2.74341 | <b><u>0.00304024</u></b> | 0.489905  | 781.107 | 749.087 | 714.722 |
| <i>C. androyensis 1</i>            | <i>C. mandrarensis 2</i>           | <i>C. greveanum-mandrarensis 2</i> | 0.0415562    | 2.71572 | <b><u>0.00330662</u></b> | 0.0992773 | 810.102 | 759.73  | 699.107 |
| <i>C. mandrarensis 1</i>           | <i>C. mandrarensis 2</i>           | <i>C. microphyllum</i>             | 0.0295901    | 2.60751 | <b><u>0.00456021</u></b> | 0.0203313 | 1283.16 | 578.354 | 545.11  |
| <i>C. greveanum-mandrarensis 2</i> | <i>C. mandrarensis 1</i>           | <i>C. microphyllum</i>             | 0.0506092    | 2.1527  | 0.015671                 | 0.0340983 | 1314.06 | 595.111 | 537.776 |
| <i>C. mandrarensis 2</i>           | <i>C. androyensis 2</i>            | <i>C. greveanum</i>                | 0.0398239    | 2.10546 | 0.0176257                | 0.011273  | 1864.51 | 460.892 | 425.589 |
| <i>C. androyensis 1</i>            | <i>C. mandrarensis 2</i>           | <i>C. greveanum-mandrarensis 1</i> | 0.0335353    | 2.08526 | 0.0185228                | 0.027944  | 788.711 | 763.158 | 713.633 |
| <i>C. greveanum-mandrarensis 1</i> | <i>C. mandrarensis 2</i>           | <i>C. microphyllum</i>             | 0.058588     | 2.01479 | 0.0219631                | 0.0406663 | 1264.83 | 613.383 | 545.487 |
| <i>C. mandrarensis 1</i>           | <i>C. androyensis 2</i>            | <i>C. greveanum</i>                | 0.0437652    | 1.9997  | 0.0227661                | 0.0123701 | 1835.66 | 466.289 | 427.186 |
| <i>C. mandrarensis 2</i>           | <i>C. androyensis 2</i>            | <i>C. microphyllum</i>             | 0.0226033    | 1.9531  | 0.0254041                | 0.0160039 | 1235.13 | 588.737 | 562.711 |
| <i>C. greveanum-mandrarensis 1</i> | <i>C. mandrarensis 1</i>           | <i>C. mandrarensis 2</i>           | 0.0358089    | 1.65592 | 0.0488694                | 0.464718  | 795.071 | 766.329 | 713.344 |
| <i>C. mandrarensis 2</i>           | <i>C. androyensis 1</i>            | <i>C. greveanum</i>                | 0.0441139    | 1.65297 | 0.049169                 | 0.0125995 | 1869.97 | 466.065 | 426.683 |
| <i>C. greveanum-mandrarensis 2</i> | <i>C. greveanum-mandrarensis 1</i> | <i>C. mandrarensis 1</i>           | 0.0391536    | 1.6399  | 0.0505129                | 0.23806   | 1133.58 | 635.279 | 587.406 |
| <i>C. mandrarensis 1</i>           | <i>C. androyensis 1</i>            | <i>C. greveanum</i>                | 0.0474895    | 1.62469 | 0.0521142                | 0.0138184 | 1808.08 | 476.246 | 433.063 |
| <i>C. greveanum-mandrarensis 2</i> | <i>C. greveanum-mandrarensis 1</i> | <i>C. androyensis 2</i>            | 0.0300688    | 1.54731 | 0.0608945                | 0.470152  | 1162.01 | 601.947 | 566.804 |
| <i>C. greveanum-mandrarensis 2</i> | <i>C. greveanum-mandrarensis 1</i> | <i>C. androyensis 1</i>            | 0.0315978    | 1.52726 | 0.0633487                | 0.111474  | 1218.46 | 588.905 | 552.829 |
| <i>C. androyensis 2</i>            | <i>C. androyensis 1</i>            | <i>C. microphyllum</i>             | 0.0268765    | 1.38969 | 0.0823115                | 0.0192112 | 1243.03 | 589.097 | 558.26  |
| <i>C. greveanum-mandrarensis 2</i> | <i>C. mandrarensis 1</i>           | <i>C. androyensis 1</i>            | 0.0268571    | 1.30396 | 0.0961233                | 0.120374  | 823.823 | 742.849 | 703.991 |
| <i>C. greveanum-mandrarensis 2</i> | <i>C. greveanum-mandrarensis 1</i> | <i>C. mandrarensis 2</i>           | 0.021273     | 1.29567 | 0.0975444                | 0.180843  | 1185.35 | 605.318 | 580.1   |
| <i>C. androyensis 1</i>            | <i>C. androyensis 2</i>            | <i>C. mandrarensis 1</i>           | 0.0232678    | 1.26445 | 0.103035                 | 0.114489  | 807.953 | 734.815 | 701.398 |

|                                    |                                    |                                    |            |           |          |            |         |         |         |
|------------------------------------|------------------------------------|------------------------------------|------------|-----------|----------|------------|---------|---------|---------|
| <i>C. mandrarensis</i> 1           | <i>C. greveanum-mandrarensis</i> 2 | <i>C. greveanum</i>                | 0.0420314  | 1.18379   | 0.118248 | 0.0117706  | 1878.51 | 459.428 | 422.365 |
| <i>C. mandrarensis</i> 1           | <i>C. greveanum-mandrarensis</i> 1 | <i>C. greveanum</i>                | 0.0445085  | 1.15065   | 0.124939 | 0.0118998  | 1905.82 | 439.288 | 401.85  |
| <i>C. mandrarensis</i> 2           | <i>C. greveanum-mandrarensis</i> 2 | <i>C. greveanum</i>                | 0.0367866  | 1.11374   | 0.132695 | 0.0105586  | 1828.5  | 468.74  | 435.476 |
| <i>C. mandrarensis</i> 2           | <i>C. greveanum-mandrarensis</i> 1 | <i>C. greveanum</i>                | 0.0384823  | 0.995624  | 0.159716 | 0.0106487  | 1836.01 | 451.44  | 417.982 |
| <i>C. greveanum-mandrarensis</i> 1 | <i>C. mandrarensis</i> 1           | <i>C. microphyllum</i>             | 0.0307927  | 0.951731  | 0.170617 | 0.0204725  | 1342.69 | 576.441 | 542.001 |
| <i>C. greveanum-mandrarensis</i> 2 | <i>C. greveanum-mandrarensis</i> 1 | <i>C. microphyllum</i>             | 0.0251229  | 0.945938  | 0.17209  | 0.0134342  | 1764.43 | 465.984 | 443.144 |
| <i>C. mandrarensis</i> 1           | <i>C. greveanum-mandrarensis</i> 1 | <i>C. androyense</i> 2             | 0.0227826  | 0.884659  | 0.18817  | 0.470842   | 808.396 | 746.629 | 713.366 |
| <i>C. microphyllum</i>             | <i>C. androyense</i> 1             | <i>C. greveanum</i>                | 0.0288724  | 0.762963  | 0.222743 | 0.0100605  | 1336.31 | 562.276 | 530.719 |
| <i>C. mandrarensis</i> 2           | <i>C. androyense</i> 2             | <i>C. greveanum-mandrarensis</i> 1 | 0.0132666  | 0.75393   | 0.225446 | 0.0114424  | 763.428 | 762.264 | 742.303 |
| <i>C. microphyllum</i>             | <i>C. androyense</i> 2             | <i>C. greveanum</i>                | 0.0247916  | 0.584897  | 0.279308 | 0.00866873 | 1314.29 | 566.972 | 539.539 |
| <i>C. microphyllum</i>             | <i>C. greveanum-mandrarensis</i> 2 | <i>C. greveanum</i>                | 0.022216   | 0.474558  | 0.317551 | 0.00817318 | 1221.73 | 589.019 | 563.417 |
| <i>C. microphyllum</i>             | <i>C. greveanum-mandrarensis</i> 1 | <i>C. greveanum</i>                | 0.0233908  | 0.471508  | 0.318639 | 0.00842537 | 1232.25 | 577.128 | 550.747 |
| <i>C. mandrarensis</i> 2           | <i>C. androyense</i> 2             | <i>C. greveanum-mandrarensis</i> 2 | 0.00672089 | 0.442292  | 0.329139 | 0.0180755  | 780.591 | 744.514 | 734.573 |
| <i>C. mandrarensis</i> 1           | <i>C. mandrarensis</i> 2           | <i>C. greveanum</i>                | 0.00439563 | 0.292312  | 0.385024 | 0.00119624 | 1905.26 | 434.145 | 430.345 |
| <i>C. mandrarensis</i> 1           | <i>C. microphyllum</i>             | <i>C. greveanum</i>                | 0.0109345  | 0.269344  | 0.393832 | 0.00386178 | 1277.83 | 562.215 | 550.053 |
| <i>C. androyense</i> 2             | <i>C. androyense</i> 1             | <i>C. greveanum</i>                | 0.00466415 | 0.203858  | 0.419232 | 0.00132371 | 1877.49 | 439.366 | 435.287 |
| <i>C. androyense</i> 2             | <i>C. androyense</i> 1             | <i>C. mandrarensis</i> 2           | 0.00296491 | 0.174235  | 0.43084  | 0.045986   | 770.949 | 736.531 | 732.176 |
| <i>C. greveanum-mandrarensis</i> 2 | <i>C. androyense</i> 1             | <i>C. greveanum</i>                | 0.00647664 | 0.170526  | 0.432298 | 0.00196649 | 1768.43 | 475.492 | 469.372 |
| <i>C. mandrarensis</i> 2           | <i>C. microphyllum</i>             | <i>C. greveanum</i>                | 0.0068663  | 0.170471  | 0.43232  | 0.00242761 | 1305.27 | 556.72  | 549.127 |
| <i>C. greveanum-mandrarensis</i> 1 | <i>C. androyense</i> 1             | <i>C. greveanum</i>                | 0.00670677 | 0.148989  | 0.440781 | 0.00196864 | 1791.73 | 462.877 | 456.71  |
| <i>C. greveanum-mandrarensis</i> 2 | <i>C. androyense</i> 2             | <i>C. greveanum</i>                | 0.00227163 | 0.082643  | 0.467068 | 0.00066153 | 1817.59 | 450.044 | 448.004 |
| <i>C. greveanum-mandrarensis</i> 1 | <i>C. mandrarensis</i> 1           | <i>C. androyense</i> 1             | 0.00203414 | 0.0804979 | 0.467921 | 0.0105181  | 842.496 | 714.143 | 711.244 |
| <i>C. greveanum-mandrarensis</i> 1 | <i>C. androyense</i> 2             | <i>C. greveanum</i>                | 0.00205751 | 0.0621516 | 0.475221 | 0.00057633 | 1839.27 | 436.329 | 434.537 |
| <i>C. greveanum-mandrarensis</i> 2 | <i>C. mandrarensis</i> 1           | <i>C. androyense</i> 2             | 0.00115809 | 0.0578715 | 0.476925 | 0.0233336  | 787.145 | 739.588 | 737.877 |
| <i>C. greveanum-mandrarensis</i> 2 | <i>C. greveanum-mandrarensis</i> 1 | <i>C. greveanum</i>                | 0.00108867 | 0.0341529 | 0.486378 | 0.00024021 | 2307.51 | 342.871 | 342.125 |

A significant  $D > 0$  is a sign of introgression between populations (P). D measures an excess of allele sharing of P3 with P1 and P2. Z measures how many standard deviations D is from its expectation, which is 0. The f4 is an estimation of the proportion of admixture. The last three columns represent the different combinations of mutations tested.
