# Supplementary material for: Species Delimitation and Conservation in Taxonomically Challenging Lineages: The Case of Two Clades of Capurodendron (Sapotaceae) in Madagascar
Source: MDPI journal article supplement (doi:10.3390/plants10081702), 2021-08-18
Supplement: s1 [file s1]

Table S1. Specimen information used in the morphological PCA. Character number and states are given in Table 2.

| Specimen          | Species              | 1               | 2 | 3 | 4 | 5 | 6 | 7 | 8  | 9  | 10 | 11 | 12 | 13 | 14 | 15 | 16 | 17 | 18 | 19 | 20 | 21 | 22 |
|-------------------|----------------------|-----------------|---|---|---|---|---|---|----|----|----|----|----|----|----|----|----|----|----|----|----|----|----|
| Phillipson 3611   | <i>C. androyense</i> | 1.5             | 1 | 1 | 2 | 2 | 0 | 1 | 11 | 6  | 2  | 2  | 0  | 0  | 0  | 0  | 1  | 1  | 4  | 4  | 0  | 3  | 3  |
| SF 11856          | <i>C. androyense</i> | NA <sup>1</sup> | 1 | 1 | 2 | 1 | 0 | 1 | 9  | 6  | 2  | 2  | 0  | 1  | 0  | 0  | 1  | 1  | 4  | 5  | 0  | 3  | 3  |
| SF 20438          | <i>C. androyense</i> | 4.5             | 1 | 1 | 2 | 2 | 0 | 1 | 10 | 5  | 2  | 2  | 0  | 1  | 0  | 0  | 1  | 1  | 4  | NA | NA | NA | NA |
| SF11867           | <i>C. androyense</i> | NA              | 1 | 1 | 2 | 1 | 0 | 1 | 10 | 6  | 2  | 2  | 0  | 0  | 0  | 0  | 0  | 1  | 4  | 4  | 0  | 3  | 2  |
| Decary 9587       | <i>C. androyense</i> | NA              | 1 | 1 | 2 | 1 | 0 | 0 | 11 | 6  | 2  | 2  | 0  | 0  | 0  | 0  | 0  | 0  | 3  | 3  | 0  | 3  | 2  |
| SF 11705          | <i>C. androyense</i> | NA              | 1 | 1 | 1 | 2 | 0 | 1 | 6  | 4  | 2  | 2  | 0  | 1  | 0  | 0  | 0  | 1  | 2  | 2  | 0  | 2  | 2  |
| Miller 3781       | <i>C. androyense</i> | 1.5             | 1 | 1 | 2 | 2 | 0 | 1 | 10 | 5  | 2  | 2  | 1  | 1  | 0  | 0  | 1  | 1  | 4  | NA | NA | NA | NA |
| Ratovoson 1451    | <i>C. androyense</i> | 5               | 1 | 1 | 2 | 2 | 0 | 1 | 8  | 5  | 2  | 2  | 1  | 1  | 0  | 0  | 1  | 1  | 3  | 2  | 0  | 2  | 2  |
| Rakotomalaza 1718 | <i>C. androyense</i> | 3.5             | 1 | 1 | 3 | 1 | 0 | 1 | 13 | 6  | 2  | 2  | 0  | 1  | 0  | 0  | 0  | 1  | 4  | NA | NA | NA | NA |
| SF 22258          | <i>C. androyense</i> | 4.5             | 1 | 1 | 2 | 2 | 0 | 1 | 13 | 4  | 1  | 0  | 1  | 1  | 0  | 0  | 1  | 1  | 4  | 3  | 0  | 3  | 2  |
| Gautier 6355      | <i>C. androyense</i> | 3.5             | 1 | 1 | 1 | 2 | 0 | 1 | 7  | 3  | 2  | 2  | 1  | 1  | 0  | 0  | 1  | 1  | 2  | 1  | 0  | 2  | 2  |
| Gautier 6353      | <i>C. androyense</i> | 4.5             | 1 | 1 | 1 | 2 | 0 | 1 | 8  | 4  | 2  | 2  | 1  | 1  | 0  | 0  | 1  | 1  | 3  | NA | NA | NA | NA |
| Gautier 6352      | <i>C. androyense</i> | 4               | 1 | 1 | 1 | 2 | 0 | 1 | 6  | 3  | 2  | 2  | 1  | 1  | 0  | 0  | 1  | 1  | 3  | NA | NA | NA | NA |
| Randrianaivo 213  | <i>C. androyense</i> | 2.5             | 1 | 1 | 2 | 2 | 0 | 1 | 10 | 5  | 2  | 2  | 1  | 1  | 0  | 0  | 1  | 1  | 6  | NA | NA | NA | NA |
| Gautier 6343      | <i>C. androyense</i> | NA              | 1 | 1 | 2 | 2 | 0 | 1 | 10 | 4  | 2  | 2  | 1  | 1  | 0  | 0  | 1  | 1  | 4  | NA | NA | NA | NA |
| Gautier 6346      | <i>C. androyense</i> | NA              | 1 | 1 | 1 | 2 | 0 | 1 | 4  | 2  | 1  | 2  | 1  | 1  | 0  | 0  | 1  | 1  | 0  | NA | NA | NA | NA |
| Gautier 6328      | <i>C. androyense</i> | 1.5             | 1 | 1 | 3 | 2 | 0 | 1 | 12 | 5  | 2  | 2  | 1  | 1  | 0  | 0  | 1  | 1  | 3  | 6  | 0  | 3  | 2  |
| Rogers 474        | <i>C. androyense</i> | 1.5             | 1 | 1 | 2 | 2 | 0 | 1 | 12 | 4  | 2  | 2  | 1  | 1  | 0  | 0  | 1  | 1  | 4  | 2  | 0  | 2  | 2  |
| Rakotomalaza 1719 | <i>C. androyense</i> | 2               | 1 | 1 | 3 | 2 | 0 | 1 | 15 | 4  | 2  | 1  | 1  | 1  | 0  | 0  | 1  | 1  | 3  | NA | NA | NA | NA |
| Gautier 6374      | <i>C. androyense</i> | 2.2             | 1 | 1 | 2 | 2 | 0 | 1 | 15 | 6  | 2  | 2  | 0  | 1  | 0  | 0  | 0  | 1  | 4  | 2  | 0  | 2  | 2  |
| Gautier 6371      | <i>C. androyense</i> | 0.1             | 1 | 1 | 1 | 2 | 0 | 1 | 8  | 6  | 2  | 2  | 0  | 1  | 0  | 0  | 0  | 1  | 3  | 3  | 0  | 2  | 2  |
| Randrianaivo 2954 | <i>C. androyense</i> | 5               | 1 | 1 | 2 | 2 | 0 | 1 | 9  | 5  | 2  | 2  | 1  | 1  | 0  | 0  | 1  | 1  | 3  | 2  | 0  | 2  | 3  |
| Gautier 6372      | <i>C. androyense</i> | 1.7             | 1 | 1 | 4 | 2 | 0 | 1 | 20 | 13 | 1  | 1  | 0  | 0  | 0  | 0  | 0  | 1  | 5  | 5  | 0  | 3  | 3  |
| Gautier 6370      | <i>C. androyense</i> | 1.5             | 1 | 1 | 1 | 2 | 0 | 1 | 13 | 5  | 2  | 2  | 0  | 0  | 0  | 0  | 0  | 1  | 5  | 2  | 0  | 2  | 2  |
| Gautier 6376      | <i>C. androyense</i> | 3.5             | 1 | 1 | 1 | 2 | 0 | 1 | 7  | 4  | 2  | 2  | 1  | 1  | 0  | 0  | 1  | 1  | 3  | 3  | 0  | 3  | 2  |
| Gautier 6358      | <i>C. androyense</i> | 1.7             | 1 | 1 | 1 | 2 | 0 | 1 | 6  | 3  | 2  | 2  | 0  | 1  | 0  | 0  | 0  | 1  | 2  | 3  | 0  | 2  | 2  |
| Gautier 6361      | <i>C. androyense</i> | 3               | 1 | 1 | 1 | 2 | 0 | 1 | 10 | 5  | 2  | 2  | 0  | 1  | 0  | 0  | 1  | 1  | 3  | 3  | 0  | 2  | 3  |

|                              |                                 |     |   |   |    |   |   |    |    |    |   |   |   |   |   |   |   |   |    |    |    |    |    |
|------------------------------|---------------------------------|-----|---|---|----|---|---|----|----|----|---|---|---|---|---|---|---|---|----|----|----|----|----|
| <b>Gautier 6387</b>          | <i>C. androyense</i>            | 2   | 1 | 1 | 3  | 2 | 0 | 0  | 19 | 8  | 2 | 2 | 1 | 1 | 0 | 0 | 1 | 1 | 4  | 4  | 0  | 3  | 3  |
| <b>Randrianaivo 2959</b>     | <i>C. androyense</i>            | 6   | 1 | 1 | 2  | 2 | 0 | 1  | 10 | 5  | 2 | 2 | 0 | 1 | 0 | 0 | 0 | 1 | 5  | 1  | 0  | 2  | 2  |
| <b>SF 22230</b>              | <i>C. androyense-mandrarens</i> | 1   | 1 | 4 | 2  | 0 | 1 | 20 | 8  | NA | 2 | 2 | 1 | 1 | 0 | 0 | 1 | 1 | 5  | 5  | 0  | 3  | 2  |
| <b>SF 22286</b>              | <i>C. androyense-mandrarens</i> | 7.5 | 1 | 1 | 6  | 2 | 0 | 1  | 32 | 14 | 2 | 2 | 1 | 1 | 0 | 0 | 1 | 1 | 6  | 6  | 0  | 3  | 3  |
| <b>Phillipson 5603</b>       | <i>C. greveanum-mandrarens</i>  | 4   | 1 | 1 | 25 | 2 | 1 | 2  | 35 | 25 | 1 | 2 | 0 | 0 | 1 | 0 | 1 | 1 | 13 | 6  | 0  | 4  | 3  |
| <b>Gautier 6339</b>          | <i>C. greveanum-mandrarens</i>  | 15  | 1 | 1 | 18 | 2 | 1 | 1  | 45 | 35 | 1 | 2 | 0 | 0 | 1 | 0 | 1 | 1 | 8  | 4  | 0  | 3  | 3  |
| <b>Gautier 6336</b>          | <i>C. greveanum-mandrarens</i>  | 3   | 1 | 1 | 18 | 1 | 1 | 1  | 45 | 22 | 1 | 2 | 0 | 0 | 1 | 0 | 1 | 1 | 8  | 6  | 0  | 3  | 3  |
| <b>Gautier 6341</b>          | <i>C. greveanum-mandrarens</i>  | 7   | 1 | 1 | 18 | 1 | 1 | 1  | 40 | 19 | 1 | 1 | 0 | 0 | 1 | 0 | 0 | 0 | 10 | 4  | 0  | 3  | 3  |
| <b>Gautier 6333</b>          | <i>C. greveanum-mandrarens</i>  | 14  | 1 | 1 | 20 | 1 | 0 | 1  | 50 | 23 | 1 | 2 | 0 | 0 | 1 | 0 | 1 | 1 | 9  | 5  | 0  | 3  | 3  |
| <b>Gautier 6331</b>          | <i>C. greveanum-mandrarens</i>  | 18  | 1 | 1 | 11 | 1 | 0 | 0  | 45 | 18 | 2 | 2 | 0 | 0 | 1 | 0 | 1 | 1 | 8  | 3  | 0  | 3  | 3  |
| <b>Randrianaivo 1187</b>     | <i>C. greveanum-mandrarens</i>  | 2.5 | 1 | 1 | 25 | 1 | 1 | 1  | 42 | 28 | 1 | 2 | 0 | 0 | 1 | 0 | 1 | 1 | 11 | NA | NA | NA | NA |
| <b>Andrianjafy 1679</b>      | <i>C. greveanum-mandrarens</i>  | 10  | 1 | 1 | 21 | 2 | 1 | 1  | 40 | 25 | 1 | 1 | 0 | 0 | 1 | 0 | 0 | 1 | 11 | 6  | 0  | 3  | 3  |
| <b>Andrianjafy 1669</b>      | <i>C. greveanum-mandrarens</i>  | 7   | 1 | 1 | 16 | 2 | 1 | 1  | 40 | 20 | 1 | 1 | 0 | 0 | 1 | 0 | 0 | 1 | 9  | 6  | 0  | 4  | 3  |
| <b>McPherson 17358</b>       | <i>C. greveanum-mandrarens</i>  | 4   | 1 | 1 | 10 | 2 | 1 | 1  | 22 | 14 | 1 | 2 | 0 | 0 | 1 | 0 | 0 | 1 | 7  | 5  | 0  | 4  | 3  |
| <b>Gautier 6337</b>          | <i>C. greveanum-mandrarens</i>  | 12  | 1 | 1 | 20 | 1 | 1 | 0  | 45 | 20 | 1 | 1 | 0 | 0 | 1 | 0 | 0 | 1 | 9  | NA | NA | NA | NA |
| <b>Razafindraibe 165</b>     | <i>C. greveanum-mandrarens</i>  | 8   | 1 | 1 | 20 | 1 | 1 | 1  | 45 | 23 | 1 | 1 | 0 | 0 | 1 | 0 | 1 | 1 | 10 | 6  | 1  | 5  | 4  |
| <b>Gautier 6332</b>          | <i>C. greveanum-mandrarens</i>  | 9   | 1 | 1 | 15 | 1 | 0 | 1  | 35 | 20 | 1 | 2 | 0 | 0 | 1 | 0 | 1 | 1 | 11 | 3  | 0  | 3  | 3  |
| <b>Gautier 6329</b>          | <i>C. greveanum-mandrarens</i>  | 12  | 1 | 1 | 20 | 1 | 0 | 1  | 43 | 19 | 1 | 1 | 0 | 0 | 1 | 0 | 0 | 0 | 11 | 3  | 0  | 3  | 3  |
| <b>SF 28965</b>              | <i>C. greveanum-mandrarens</i>  | NA  | 1 | 1 | 14 | 2 | 1 | 0  | 22 | 20 | 1 | 2 | 0 | 0 | 1 | 0 | 1 | 1 | 9  | 3  | 1  | 3  | 3  |
| <b>Thomas 30885</b>          | <i>C. greveanum-mandrarens</i>  | 2   | 1 | 1 | 18 | 1 | 0 | 1  | 39 | 19 | 1 | 1 | 0 | 0 | 1 | 0 | 1 | 1 | 10 | 6  | 1  | 3  | 2  |
| <b>Thomas 30799</b>          | <i>C. greveanum-mandrarens</i>  | 2   | 1 | 1 | 18 | 1 | 0 | 0  | 46 | 22 | 1 | 2 | 0 | 0 | 1 | 0 | 1 | 1 | 10 | 4  | 1  | 3  | 2  |
| <b>SF20831</b>               | <i>C. greveanum-mandrarens</i>  | 9   | 1 | 1 | 28 | 1 | 1 | 1  | 55 | 32 | 1 | 2 | 0 | 0 | 1 | 0 | 1 | 1 | 11 | 6  | 1  | 3  | 3  |
| <b>Schatz 2477</b>           | <i>C. greveanum-mandrarens</i>  | 5   | 1 | 1 | 22 | 2 | 0 | 1  | 41 | 21 | 1 | 2 | 0 | 0 | 1 | 0 | 1 | 1 | 9  | 6  | 1  | 3  | 3  |
| <b>42R224</b>                | <i>C. mandrarens</i>            | NA  | 1 | 1 | 13 | 2 | 0 | 1  | 45 | 20 | 2 | 1 | 0 | 1 | 1 | 1 | 1 | 1 | 9  | NA | NA | NA | NA |
| <b>SF 28954</b>              | <i>C. mandrarens</i>            | 7.5 | 1 | 1 | 16 | 2 | 0 | 1  | 55 | 30 | 1 | 1 | 1 | 1 | 1 | 1 | 1 | 1 | 9  | NA | NA | NA | NA |
| <b>Randrianasolo 204</b>     | <i>C. mandrarens</i>            | 2.5 | 1 | 1 | 11 | 2 | 1 | 1  | 36 | 19 | 1 | 1 | 1 | 1 | 1 | 1 | 1 | 1 | 7  | 3  | 1  | 2  | 2  |
| <b>Ratovoson 1473</b>        | <i>C. mandrarens</i>            | 4   | 1 | 1 | 10 | 2 | 0 | 1  | 30 | 10 | 1 | 1 | 1 | 1 | 1 | 1 | 1 | 1 | 8  | 3  | 1  | 3  | 3  |
| <b>Andriamahajarivo 1532</b> | <i>C. mandrarens</i>            | 7   | 1 | 1 | 7  | 2 | 1 | 1  | 42 | 20 | 1 | 1 | 1 | 1 | 1 | 1 | 1 | 1 | 7  | 3  | 1  | 3  | 3  |
| <b>Randrianaivo 2956</b>     | <i>C. mandrarens</i>            | 8   | 1 | 1 | 14 | 1 | 1 | 1  | 50 | 25 | 1 | 1 | 1 | 1 | 1 | 1 | 1 | 1 | 8  | NA | NA | NA | NA |
| <b>Randrianaivo 1764</b>     | <i>C. mandrarens</i>            | 4   | 1 | 1 | 16 | 1 | 1 | 1  | 36 | 15 | 1 | 1 | 1 | 1 | 1 | 1 | 1 | 1 | 10 | NA | NA | NA | NA |

|                             |                        |     |   |   |     |   |   |   |    |    |   |   |   |   |   |   |   |   |   |    |    |    |    |
|-----------------------------|------------------------|-----|---|---|-----|---|---|---|----|----|---|---|---|---|---|---|---|---|---|----|----|----|----|
| <b>Randrianaivo 1785</b>    | <i>C. mandrarenses</i> | 4.5 | 1 | 1 | 14  | 1 | 0 | 1 | 29 | 17 | 1 | 1 | 1 | 1 | 1 | 1 | 1 | 1 | 8 | 7  | 1  | 3  | 3  |
| <b>Randrianaivo 2966</b>    | <i>C. mandrarenses</i> | 3   | 1 | 1 | 10  | 2 | 0 | 1 | 59 | 30 | 1 | 1 | 0 | 1 | 1 | 1 | 1 | 1 | 7 | NA | NA | NA | NA |
| <b>Randrianaivo 2964</b>    | <i>C. mandrarenses</i> | 3   | 1 | 1 | 13  | 2 | 0 | 1 | 30 | 24 | 1 | 1 | 0 | 1 | 1 | 1 | 1 | 1 | 7 | 4  | 1  | 3  | 3  |
| <b>Randrianaivo 2962</b>    | <i>C. mandrarenses</i> | 3.5 | 1 | 1 | 6   | 2 | 0 | 2 | 25 | 18 | 1 | 2 | 0 | 1 | 1 | 1 | 1 | 1 | 7 | 3  | 1  | 3  | 3  |
| <b>Randrianaivo 2967</b>    | <i>C. mandrarenses</i> | 3   | 1 | 1 | 10  | 2 | 0 | 1 | 42 | 19 | 1 | 1 | 0 | 1 | 1 | 1 | 1 | 1 | 9 | NA | NA | NA | NA |
| <b>Randrianaivo 2958</b>    | <i>C. mandrarenses</i> | 8   | 1 | 1 | 9   | 1 | 0 | 0 | 43 | 20 | 1 | 1 | 0 | 1 | 1 | 1 | 1 | 1 | 8 | NA | NA | NA | NA |
| <b>Randrianaivo 2963</b>    | <i>C. mandrarenses</i> | 2.5 | 1 | 1 | 11  | 1 | 0 | 1 | 54 | 29 | 1 | 2 | 0 | 1 | 1 | 1 | 1 | 1 | 9 | NA | NA | NA | NA |
| <b>Randrianaivo 2965</b>    | <i>C. mandrarenses</i> | 2.5 | 1 | 1 | 6   | 1 | 0 | 1 | 32 | 14 | 1 | 1 | 0 | 1 | 1 | 1 | 1 | 1 | 7 | NA | NA | NA | NA |
| <b>Randrianaivo 2961</b>    | <i>C. mandrarenses</i> | 3.5 | 1 | 1 | 13  | 1 | 1 | 1 | 45 | 27 | 1 | 1 | 0 | 1 | 1 | 1 | 1 | 1 | 5 | NA | NA | NA | NA |
| <b>Randrianaivo 2957</b>    | <i>C. mandrarenses</i> | 9   | 1 | 1 | 13  | 1 | 0 | 1 | 53 | 39 | 1 | 1 | 0 | 1 | 1 | 1 | 1 | 1 | 7 | NA | NA | NA | NA |
| <b>RN5035</b>               | <i>C. mandrarenses</i> | NA  | 1 | 1 | 12  | 2 | 0 | 1 | 40 | 19 | 1 | 1 | 0 | 1 | 1 | 1 | 1 | 1 | 7 | 5  | 1  | 3  | 3  |
| <b>Gautier 5793</b>         | <i>C. mandrarenses</i> | 4   | 0 | 1 | 10  | 2 | 0 | 1 | 44 | 24 | 1 | 1 | 1 | 1 | 1 | 1 | 1 | 1 | 8 | NA | NA | NA | NA |
| <b>Rakotomalaza 603</b>     | <i>C. mandrarenses</i> | 4   | 1 | 1 | 11  | 2 | 0 | 1 | 54 | 26 | 1 | 1 | 0 | 1 | 1 | 1 | 1 | 1 | 8 | 2  | 1  | 3  | 3  |
| <b>Gautier 6356</b>         | <i>C. mandrarenses</i> | 4   | 1 | 1 | 6   | 2 | 0 | 1 | 25 | 18 | 1 | 1 | 1 | 1 | 1 | 1 | 1 | 1 | 6 | NA | NA | NA | NA |
| <b>Randrianaivo 2965</b>    | <i>C. mandrarenses</i> | 2.5 | 1 | 1 | 11  | 2 | 0 | 1 | 45 | 27 | 1 | 1 | 0 | 1 | 1 | 1 | 1 | 1 | 8 | NA | NA | NA | NA |
| <b>Gautier 6378</b>         | <i>C. mandrarenses</i> | 3   | 0 | 1 | 3   | 2 | 0 | 1 | 25 | 15 | 1 | 1 | 0 | 1 | 1 | 1 | 1 | 1 | 6 | NA | NA | NA | NA |
| <b>Andriamihajarivo 498</b> | <i>C. mandrarenses</i> | NA  | 1 | 1 | 14  | 2 | 0 | 1 | 35 | 18 | 1 | 1 | 1 | 1 | 1 | 1 | 1 | 1 | 6 | 3  | 1  | 3  | 3  |
| <b>Rolland 249</b>          | <i>C. mandrarenses</i> | NA  | 0 | 1 | 9   | 2 | 0 | 1 | 24 | 16 | 1 | 1 | 1 | 1 | 1 | 1 | 1 | 1 | 7 | NA | NA | NA | NA |
| <b>Randrianaivo 899</b>     | <i>C. mandrarenses</i> | 3   | 1 | 1 | 10  | 2 | 0 | 1 | 27 | 10 | 1 | 1 | 1 | 1 | 1 | 1 | 1 | 1 | 7 | NA | NA | NA | NA |
| <b>Dumetz 1414</b>          | <i>C. mandrarenses</i> | 3   | 1 | 1 | 14  | 2 | 0 | 1 | 39 | 21 | 1 | 1 | 1 | 1 | 1 | 1 | 1 | 1 | 9 | NA | NA | NA | NA |
| <b>Rabevohitra 2392</b>     | <i>C. mandrarenses</i> | 5   | 1 | 1 | 14  | 2 | 0 | 1 | 30 | 20 | 1 | 1 | 1 | 1 | 1 | 1 | 1 | 1 | 7 | 2  | 1  | 2  | 2  |
| <b>Phillipson 2843</b>      | <i>C. mandrarenses</i> | 10  | 1 | 1 | 142 | 2 | 0 | 1 | 36 | 16 | 1 | 1 | 1 | 1 | 1 | 1 | 1 | 1 | 7 | 10 | 1  | 3  | 3  |
| <b>Gautier 6351</b>         | <i>C. mandrarenses</i> | 6   | 1 | 1 | 10  | 2 | 0 | 1 | 39 | 19 | 1 | 1 | 0 | 1 | 1 | 1 | 1 | 1 | 6 | NA | NA | NA | NA |
| <b>Gautier 6350</b>         | <i>C. mandrarenses</i> | 1   | 1 | 1 | 6   | 2 | 0 | 1 | 21 | 11 | 1 | 1 | 1 | 1 | 1 | 1 | 1 | 1 | 5 | NA | NA | NA | NA |
| <b>Gautier 6349</b>         | <i>C. mandrarenses</i> | 8   | 1 | 1 | 13  | 2 | 0 | 1 | 42 | 29 | 1 | 1 | 1 | 1 | 1 | 1 | 1 | 1 | 8 | NA | NA | NA | NA |
| <b>Randrianaivo 2978</b>    | <i>C. mandrarenses</i> | 10  | 1 | 1 | 12  | 2 | 0 | 1 | 46 | 21 | 1 | 1 | 0 | 1 | 1 | 1 | 1 | 1 | 7 | NA | NA | NA | NA |
| <b>Randrianaivo 2971</b>    | <i>C. mandrarenses</i> | 12  | 1 | 1 | 12  | 2 | 0 | 1 | 25 | 20 | 1 | 2 | 1 | 1 | 1 | 1 | 1 | 1 | 7 | NA | NA | NA | NA |
| <b>Randrianaivo 2980</b>    | <i>C. mandrarenses</i> | 5   | 1 | 1 | 8   | 2 | 0 | 1 | 32 | 15 | 1 | 1 | 1 | 1 | 1 | 1 | 1 | 1 | 8 | NA | NA | NA | NA |
| <b>Randrianaivo 2970</b>    | <i>C. mandrarenses</i> | 15  | 1 | 1 | 10  | 2 | 0 | 2 | 37 | 20 | 1 | 2 | 1 | 1 | 1 | 1 | 1 | 1 | 8 | NA | NA | NA | NA |
| <b>Randrianaivo 2981</b>    | <i>C. mandrarenses</i> | 15  | 1 | 1 | 12  | 2 | 0 | 2 | 39 | 25 | 1 | 1 | 1 | 1 | 1 | 1 | 1 | 1 | 7 | 4  | 1  | 3  | 3  |

|                        |                        |     |    |   |    |   |   |   |     |    |   |   |   |   |   |   |   |   |    |    |    |    |    |
|------------------------|------------------------|-----|----|---|----|---|---|---|-----|----|---|---|---|---|---|---|---|---|----|----|----|----|----|
| SF 6692                | <i>C. mandrarensse</i> | NA  | NA | 1 | 5  | 2 | 0 | 2 | 35  | 22 | 1 | 1 | 1 | 1 | 1 | 1 | 1 | 1 | 7  | NA | NA | NA | NA |
| SF 3462                | <i>C. greveanum</i>    | NA  | 0  | 0 | 32 | 0 | 1 | 2 | 115 | 70 | 1 | 1 | 0 | 0 | 1 | 0 | 0 | 0 | 10 | NA | NA | NA | NA |
| Ralimanana 70          | <i>C. greveanum</i>    | 10  | 0  | 0 | 35 | 0 | 1 | 1 | 59  | 41 | 1 | 1 | 0 | 0 | 1 | 0 | 0 | 0 | 10 | 9  | 0  | 3  | 2  |
| Razafimandimbison 2277 | <i>C. greveanum</i>    | 6.5 | 0  | 0 | 34 | 0 | 1 | 1 | 52  | 39 | 1 | 1 | 0 | 0 | 0 | 0 | 0 | 0 | 10 | 5  | 0  | 3  | 3  |
| Ratovoson 2115         | <i>C. greveanum</i>    | 1.5 | 0  | 0 | 41 | 0 | 1 | 1 | 55  | 36 | 1 | 1 | 0 | 0 | 1 | 0 | 0 | 0 | 14 | NA | NA | NA | NA |
| Razafitsalama 854      | <i>C. greveanum</i>    | 3   | 0  | 0 | 35 | 0 | 0 | 2 | 64  | 40 | 1 | 1 | 0 | 0 | 1 | 0 | 0 | 0 | 14 | NA | NA | NA | NA |
| Callmander 471         | <i>C. greveanum</i>    | 4   | 0  | 0 | 37 | 0 | 1 | 2 | 67  | 35 | 1 | 1 | 0 | 0 | 1 | 0 | 0 | 0 | 13 | 4  | 0  | 3  | 3  |
| Razafitsalama 595      | <i>C. greveanum</i>    | 3   | 0  | 0 | 30 | 0 | 1 | 2 | 55  | 38 | 1 | 1 | 0 | 0 | 1 | 0 | 0 | 0 | 15 | 6  | 0  | 3  | 2  |
| Schatz 4200            | <i>C. greveanum</i>    | 2.5 | 0  | 0 | 38 | 0 | 0 | 2 | 68  | 42 | 1 | 1 | 0 | 0 | 1 | 0 | 0 | 0 | 13 | 9  | 0  | 3  | 2  |
| Rakotonandrasana 1203  | <i>C. greveanum</i>    | 4   | 0  | 0 | 51 | 0 | 1 | 1 | 54  | 33 | 1 | 1 | 0 | 0 | 1 | 0 | 0 | 0 | 11 | NA | NA | NA | NA |
| Jullet 255             | <i>C. greveanum</i>    | 4   | 0  | 0 | 23 | 0 | 0 | 2 | 49  | 35 | 1 | 2 | 0 | 0 | 1 | 0 | 0 | 0 | 12 | NA | NA | NA | NA |
| Gautier 5485           | <i>C. greveanum</i>    | 3   | 0  | 0 | 30 | 0 | 1 | 2 | 61  | 37 | 1 | 1 | 0 | 0 | 1 | 0 | 0 | 0 | 13 | NA | NA | NA | NA |
| SF 13123               | <i>C. greveanum</i>    | NA  | 0  | 0 | 31 | 0 | 1 | 2 | 74  | 44 | 1 | 1 | 0 | 0 | 1 | 0 | 0 | 0 | 13 | 8  | 0  | 3  | 3  |
| Randrianaivo 2977      | <i>C. greveanum</i>    | 15  | 0  | 0 | 36 | 0 | 0 | 1 | 77  | 41 | 1 | 1 | 0 | 0 | 1 | 0 | 0 | 0 | 10 | 9  | 0  | 3  | 3  |
| Applequist 158         | <i>C. greveanum</i>    | 2   | 0  | 0 | 35 | 0 | 0 | 1 | 67  | 30 | 1 | 1 | 0 | 0 | 1 | 0 | 0 | 0 | 17 | NA | NA | NA | NA |
| Ratovoson 832          | <i>C. greveanum</i>    | 2   | 0  | 0 | 22 | 0 | 0 | 1 | 57  | 31 | 1 | 1 | 0 | 0 | 1 | 0 | 0 | 0 | 16 | NA | NA | NA | NA |
| SF 5878                | <i>C. greveanum</i>    | NA  | 0  | 0 | 25 | 0 | 1 | 1 | 62  | 29 | 1 | 1 | 0 | 0 | 1 | 0 | 0 | 0 | 14 | NA | NA | NA | NA |
| Randrianaivo 476       | <i>C. greveanum</i>    | 15  | 0  | 0 | 14 | 0 | 1 | 0 | 46  | 29 | 1 | 2 | 0 | 0 | 1 | 0 | 0 | 0 | 15 | NA | NA | NA | NA |
| Randrianaivo 2974      | <i>C. greveanum</i>    | 12  | 0  | 0 | 34 | 0 | 1 | 1 | 76  | 33 | 1 | 1 | 0 | 0 | 1 | 0 | 0 | 0 | 13 | 7  | 0  | 3  | 2  |
| Ranaivojaon n?         | <i>C. greveanum</i>    | 7   | 0  | 0 | 27 | 0 | 1 | 2 | 59  | 25 | 1 | 1 | 0 | 0 | 1 | 0 | 0 | 0 | 9  | 8  | 0  | 3  | 2  |
| Randrianaivo 2982      | <i>C. greveanum</i>    | 10  | 0  | 0 | 20 | 0 | 0 | 1 | 56  | 31 | 1 | 1 | 0 | 0 | 1 | 0 | 0 | 0 | 12 | NA | NA | NA | NA |
| Jongkind 3623          | <i>C. greveanum</i>    | 4.5 | 0  | 0 | 36 | 0 | 1 | 1 | 56  | 33 | 1 | 1 | 0 | 0 | 1 | 0 | 0 | 0 | 14 | NA | NA | NA | NA |
| Randrianaivo 2975      | <i>C. greveanum</i>    | 25  | 0  | 0 | 29 | 0 | 1 | 1 | 51  | 36 | 1 | 1 | 0 | 0 | 1 | 0 | 0 | 0 | 11 | NA | NA | NA | NA |
| Rabevohitra 4519       | <i>C. greveanum</i>    | NA  | 0  | 0 | 36 | 0 | 1 | 2 | 64  | 50 | 1 | 1 | 0 | 0 | 1 | 0 | 0 | 0 | 14 | 7  | 0  | 3  | 2  |
| Randrianaivo 600       | <i>C. greveanum</i>    | 2   | 0  | 0 | 24 | 0 | 1 | 1 | 70  | 30 | 1 | 2 | 0 | 0 | 1 | 0 | 0 | 0 | 15 | NA | NA | NA | NA |
| Cheek 1487             | <i>C. greveanum</i>    | 4   | 0  | 0 | 47 | 0 | 0 | 0 | 70  | 39 | 1 | 2 | 0 | 0 | 1 | 0 | 0 | 0 | 20 | NA | NA | NA | NA |
| SF 12796               | <i>C. greveanum</i>    | NA  | 0  | 0 | 34 | 0 | 0 | 1 | 61  | 35 | 1 | 1 | 0 | 0 | 1 | 0 | 0 | 0 | 14 | 6  | 0  | 3  | 2  |
| SF 6900                | <i>C. greveanum</i>    | NA  | 0  | 0 | 42 | 0 | 0 | 1 | 76  | 35 | 1 | 1 | 0 | 0 | 1 | 0 | 0 | 0 | 11 | 7  | 0  | 3  | 2  |
| Rabenontoandro 610     | <i>C. greveanum</i>    | 0.5 | 0  | 0 | 26 | 0 | 1 | 1 | 50  | 20 | 1 | 1 | 0 | 0 | 1 | 0 | 0 | 0 | 12 | NA | NA | NA | NA |
| Gautier 6382           | <i>C. microphyllum</i> | 3   | 0  | 1 | 3  | 1 | 0 | 1 | 16  | 3  | 1 | 0 | 0 | 0 | 0 | 0 | 0 | 0 | 2  | 4  | 0  | 2  | 2  |

|                         |                        |     |   |   |   |   |   |   |    |   |   |   |   |   |   |   |   |   |   |    |    |    |    |
|-------------------------|------------------------|-----|---|---|---|---|---|---|----|---|---|---|---|---|---|---|---|---|---|----|----|----|----|
| <b>Randrianaivo 890</b> | <i>C. microphyllum</i> | 3   | 0 | 1 | 3 | 1 | 0 | 1 | 17 | 5 | 1 | 1 | 0 | 0 | 1 | 0 | 0 | 0 | 3 | NA | NA | NA | NA |
| <b>Gautier 6393</b>     | <i>C. microphyllum</i> | 1.8 | 0 | 1 | 4 | 2 | 0 | 1 | 17 | 6 | 1 | 1 | 0 | 1 | 0 | 0 | 1 | 0 | 3 | NA | NA | NA | NA |
| <b>Gautier 5794</b>     | <i>C. microphyllum</i> | 1.8 | 0 | 1 | 2 | 1 | 0 | 1 | 15 | 7 | 1 | 0 | 0 | 0 | 1 | 0 | 0 | 0 | 4 | NA | NA | NA | NA |
| <b>Gautier 6381</b>     | <i>C. microphyllum</i> | 2.5 | 0 | 1 | 2 | 1 | 0 | 1 | 20 | 5 | 1 | 0 | 0 | 0 | 0 | 0 | 0 | 0 | 3 | 3  | 0  | 2  | 2  |
| <b>Gautier 6383</b>     | <i>C. microphyllum</i> | 2.5 | 0 | 1 | 2 | 1 | 0 | 1 | 20 | 5 | 1 | 0 | 0 | 0 | 1 | 0 | 0 | 0 | 3 | 5  | 0  | 2  | 2  |
| <b>Thulin 11814</b>     | <i>C. microphyllum</i> | 3   | 0 | 1 | 2 | 2 | 0 | 1 | 14 | 4 | 1 | 0 | 0 | 0 | 0 | 0 | 0 | 0 | 3 | 3  | 0  | 2  | 2  |

<sup>1</sup> Non available data.
