# Supplementary figures and images for: Species Delimitation and Conservation in Taxonomically Challenging Lineages: The Case of Two Clades of Capurodendron (Sapotaceae) in Madagascar
Source: MDPI journal article supplement (doi:10.3390/plants10081702), 2021-08-18

## Capurodendron Arid Complex

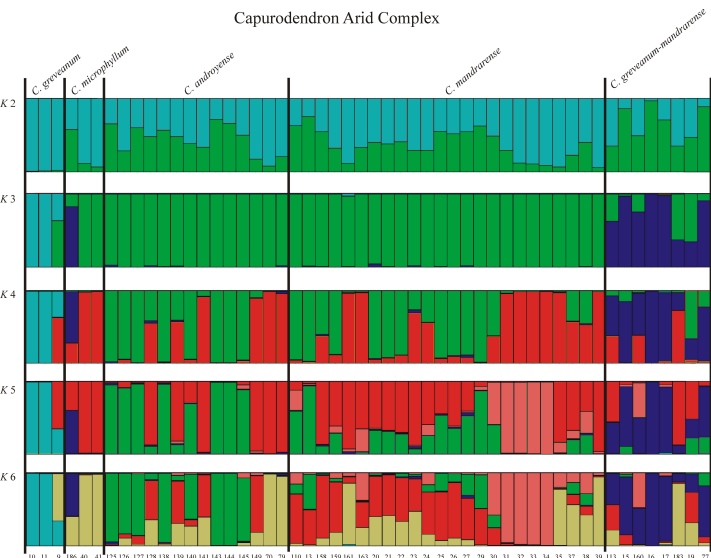

## Capurodendron Western Complex

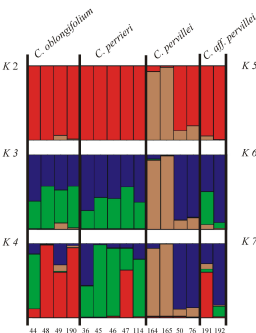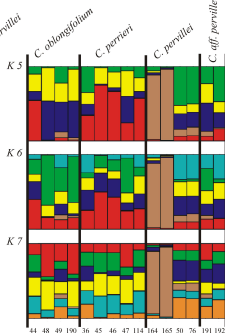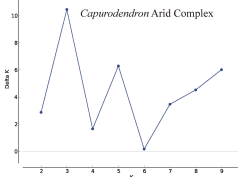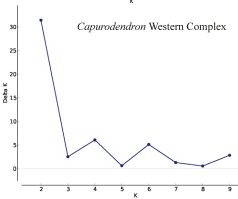

Supplement: s1 [file s1]
